# Supplementary material for: The Dipeptidyl Peptidase-4 Inhibitor Linagliptin Directly Enhances the Contractile Recovery of Mouse Hearts at a Concentration Equivalent to that Achieved with Standard Dosing in Humans
Source: PubMed Central journal article supplement (PMC7460951; doi:10.3390/ijms21165756), 2020-08-11
Supplement: ijms-21-05756-s001.pdf [file ijms-21-05756-s001.pdf]

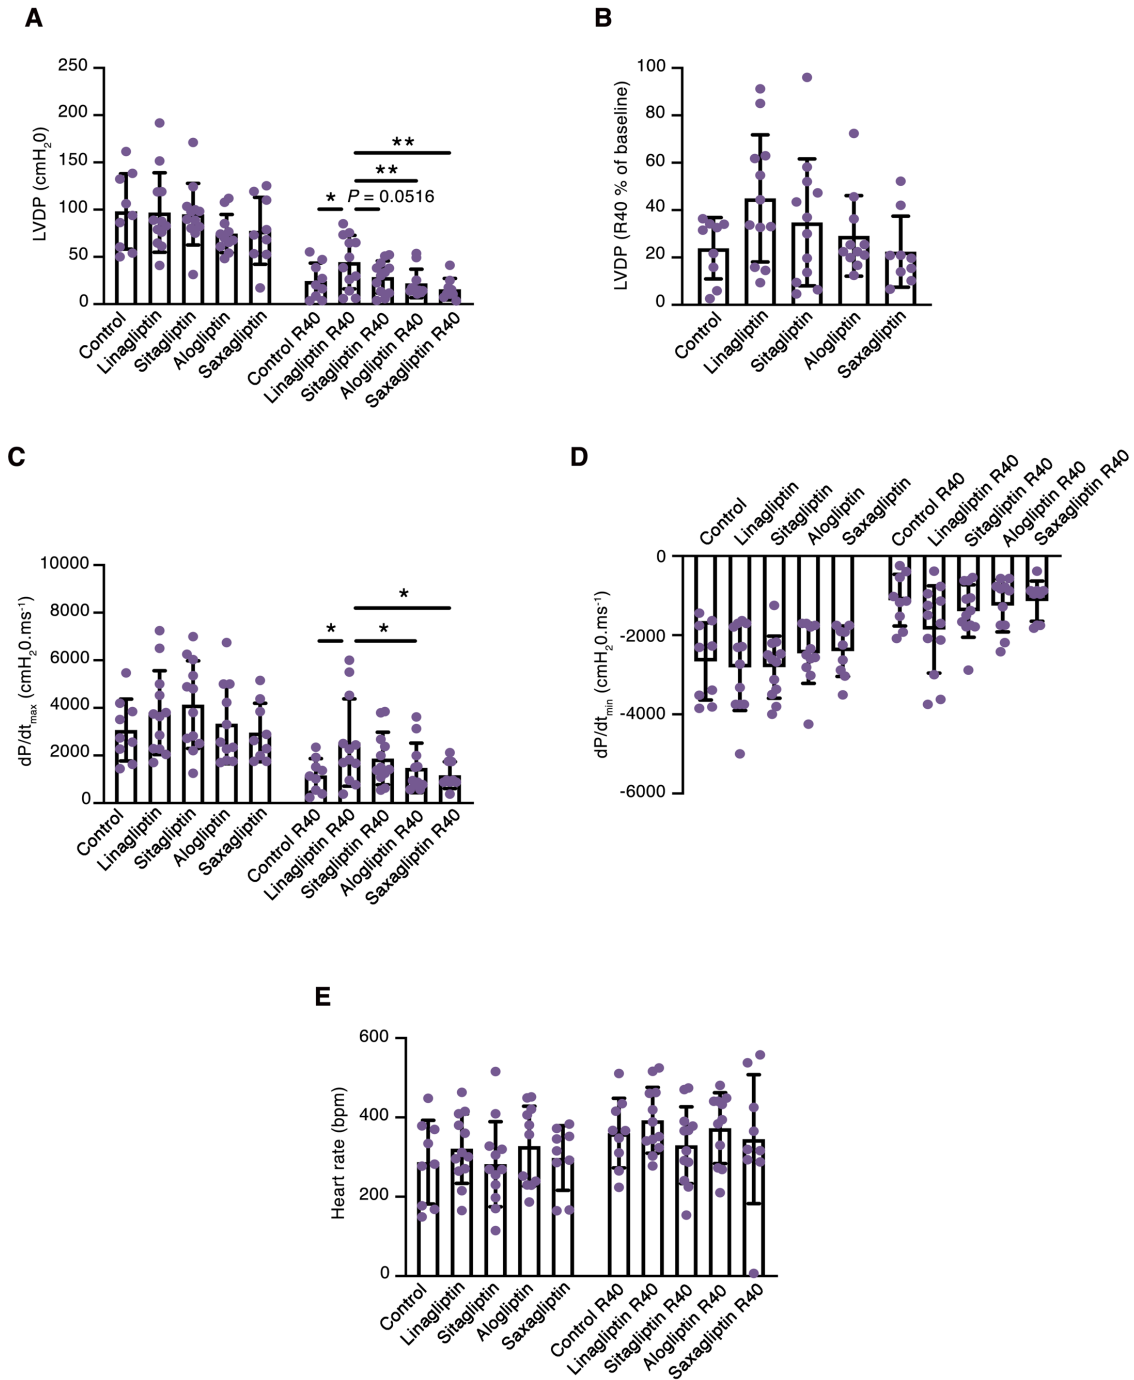

**Supporting Information Figure 1. Effect of different DPP-4 inhibitors, administered at human  $C_{max}$  equivalent, on the ex vivo function of hearts of non-diabetic young male mice at baseline and 40 minutes after ischemia perfusion (R40). (A) Left ventricular developed pressure (LVDP). (B) Percentage recovery of LVDP 40 minutes after reperfusion (%LVDP R40). (C)  $dP/dt_{max}$ . (D)  $dP/dt_{min}$ . (E) Heart rate. bpm = beats per minute. Values are mean  $\pm$  S.D.. Control (n=9), linagliptin (n=12), sitagliptin (n=12), alogliptin (n=11), saxagliptin (n=9). \* $P < 0.05$ , \*\* $P < 0.01$  by 1-way ANOVA followed by Fisher least significant difference post hoc test.**

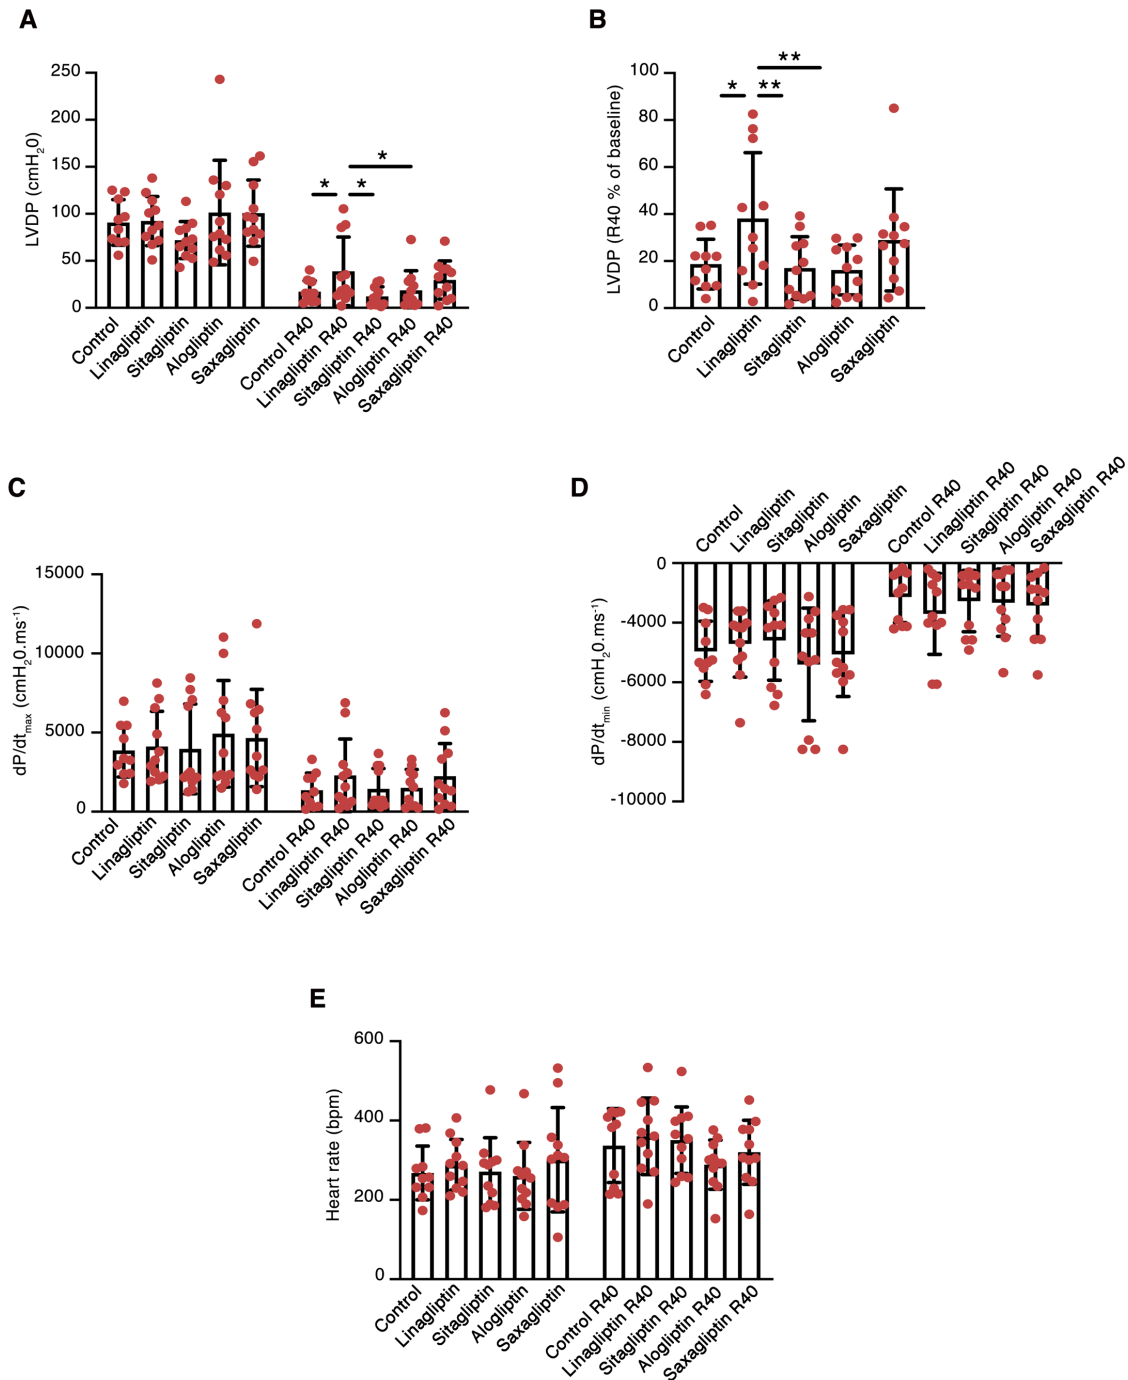

**Supporting Information Figure 2. Effect of different DPP-4 inhibitors, administered at human C<sub>max</sub> equivalent, on the ex vivo function of hearts of non-diabetic young female mice at baseline and 40 minutes after ischemia perfusion (R40). (A) Left ventricular developed pressure (LVDP). (B) Percentage recovery of LVDP 40 minutes after reperfusion (%LVDP R40). (C) dP/dt<sub>max</sub>. (D) dP/dt<sub>min</sub>. (E) Heart rate. bpm = beats per minute. Values are mean ± S.D.. Control (n=10), linagliptin (n=11), sitagliptin (n=11), alogliptin (n=11), saxagliptin (n=11). \**P* < 0.05, \*\**P* < 0.01 by 1-way ANOVA followed by Fisher least significant difference post hoc test.**

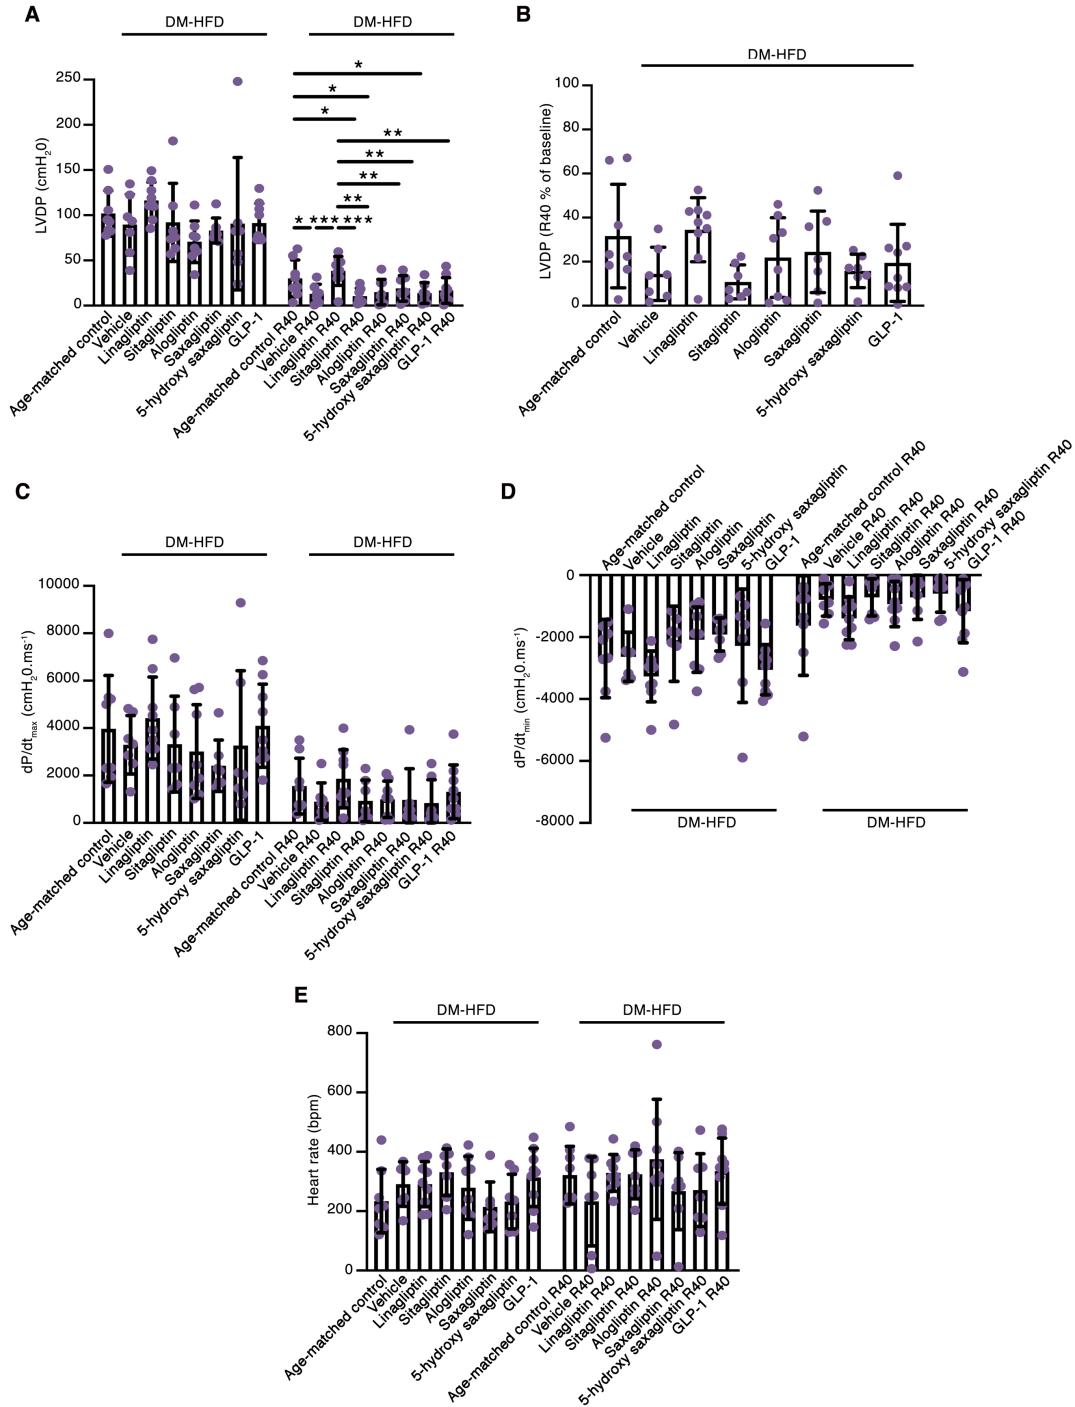

**Supporting Information Figure 3. Effect of different DPP-4 inhibitors, administered at human C<sub>max</sub> equivalent, on the ex vivo function of aged, diabetic high fat diet-fed (DM-HFD) male mice at baseline and 40 minutes after ischemia perfusion (R40). (A) Left ventricular developed pressure (LVDP). (B) Percentage recovery of LVDP 40 minutes after reperfusion (%LVDP R40). (C) dPdt<sub>max</sub>. (D) dPdt<sub>min</sub>. (E) Heart rate. bpm = beats per minute. Values are mean ± S.D.. Age-matched control (n=9), vehicle (n=8), linagliptin (n=9), sitagliptin (n=7), alogliptin (n=9), saxagliptin (n=8), 5-hydroxy saxagliptin (n=8), GLP-1 (n=9). \**P* < 0.05, \*\**P* < 0.01, \*\*\**P* < 0.001 by 1-way ANOVA followed by Fisher least significant difference post hoc test.**

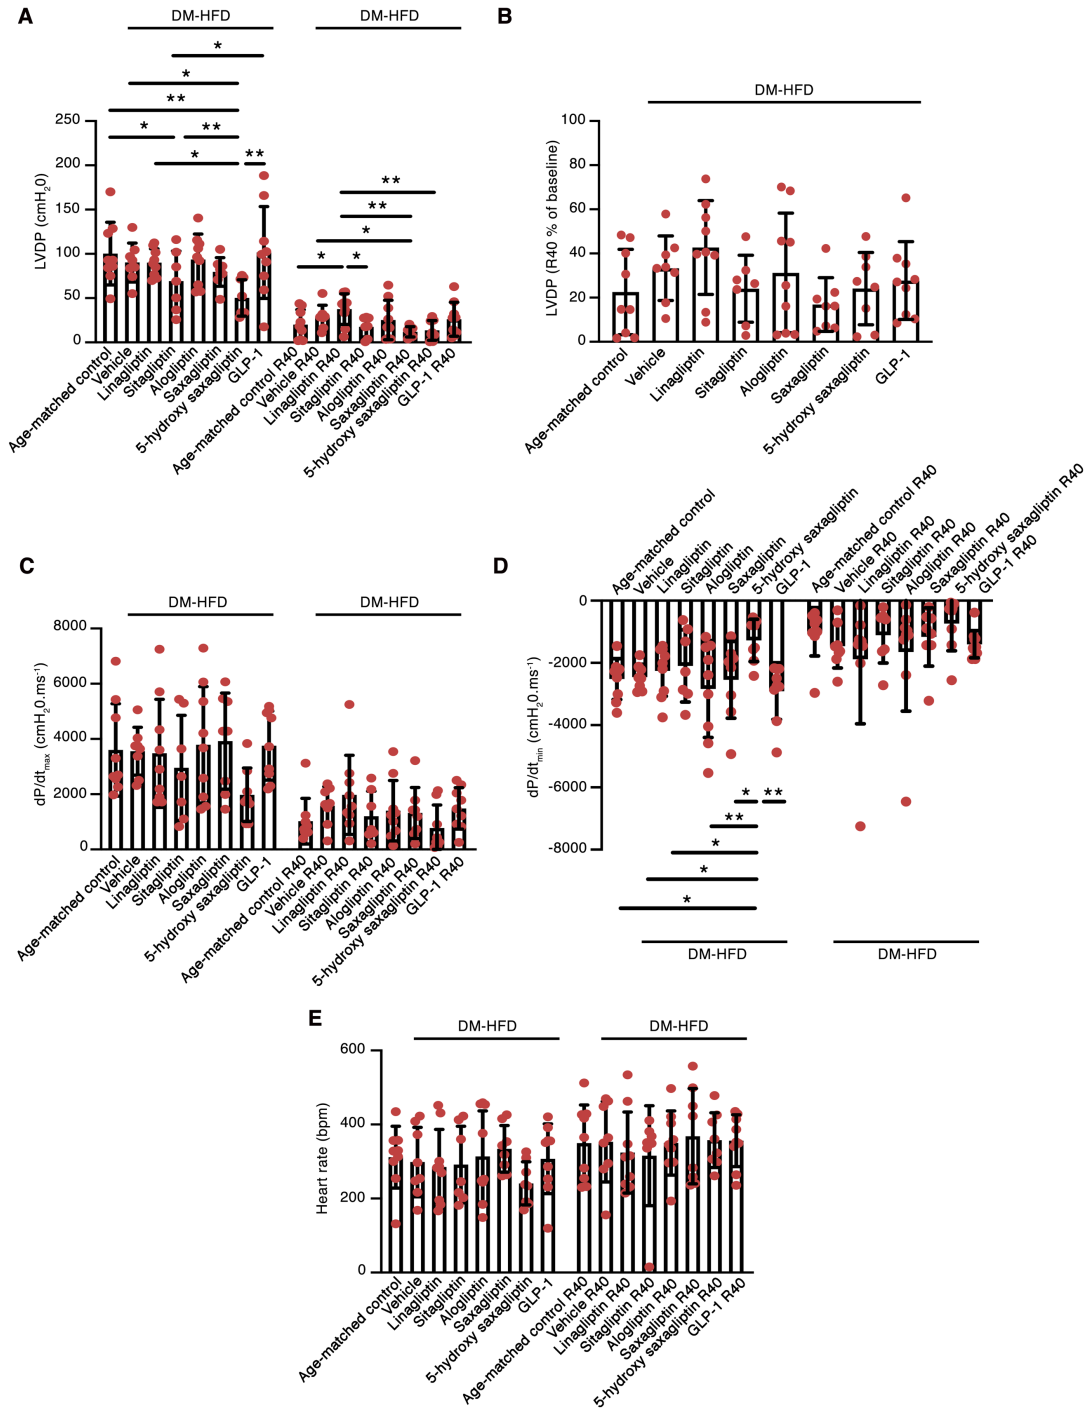

**Supporting Information Figure 4. Effect of different DPP-4 inhibitors, administered at human C<sub>max</sub> equivalent, on the ex vivo function of aged, diabetic high fat diet-fed (DM-HFD) female mice at baseline and 40 minutes after ischemia perfusion (R40). (A) Left ventricular developed pressure (LVDP). (B) Percentage recovery of LVDP 40 minutes after reperfusion (%LVDP R40). (C) dPdt<sub>max</sub>. (D) dPdt<sub>min</sub>. (E) Heart rate. bpm = beats per minute. Values are mean ± S.D.. Age-matched control (n=8), vehicle (n=7), linagliptin (n=9), sitagliptin (n=7), alogliptin (n=8), saxagliptin (n=7), 5-hydroxy saxagliptin (n=7), GLP-1 (n=9). \**P* < 0.05, \*\**P* < 0.01 by 1-way ANOVA followed by Fisher least significant difference post hoc test.**

**Supplementary Information Table 1. Differentially expressed (upregulated) genes in control cardiomyocytes exposed to linagliptin (9nmol/L) for 24h in comparison to vehicle (n=5/condition).**

| Gene name         | log2(Fold change) | Fold change | p_value     | q_value     |
|-------------------|-------------------|-------------|-------------|-------------|
| <i>Pde2a</i>      | 1.123765923       | 2.179150629 | 0.026728817 | 0.788844993 |
| <i>Pakap</i>      | 1.097769341       | 2.140235188 | 0.002002104 | 0.626341967 |
| <i>Itgav</i>      | 0.841945222       | 1.792465339 | 0.046965774 | 0.850540672 |
| <i>Tmem230</i>    | 0.704445688       | 1.629531092 | 0.023037313 | 0.766040657 |
| <i>Fbxo33</i>     | 0.667180076       | 1.587966058 | 0.006254718 | 0.668087463 |
| <i>Gm27021</i>    | 0.633295634       | 1.551104229 | 0.004971577 | 0.6576427   |
| <i>AL732309.1</i> | 0.621255347       | 1.53821306  | 0.021027694 | 0.758274182 |
| <i>Crispld2</i>   | 0.597129679       | 1.512703963 | 0.01977031  | 0.74928387  |
| <i>Arpc5</i>      | 0.58729635        | 1.502428516 | 0.049018486 | 0.850540672 |

**Supplementary Information Table 2. Differentially expressed (downregulated) genes in control cardiomyocytes exposed to linagliptin (9nmol/L) for 24h in comparison to vehicle (n=5/condition).**

| Gene name         | log2(Fold change) | Fold change | p_value     | q_value     |
|-------------------|-------------------|-------------|-------------|-------------|
| <i>Usp50</i>      | -1.219344766      | 0.429477731 | 0.040243182 | 0.846390493 |
| <i>Gm27029</i>    | -0.866475682      | 0.548485094 | 0.00463147  | 0.6576427   |
| <i>Tmem70</i>     | -0.853630319      | 0.553390461 | 0.048466767 | 0.850540672 |
| <i>AC158777.2</i> | -0.811218683      | 0.569900245 | 0.035967721 | 0.822769655 |
| <i>Gm45837</i>    | -0.753195136      | 0.593288146 | 0.039033096 | 0.833688523 |
| <i>Ccdc71</i>     | -0.638440549      | 0.64240697  | 0.04315159  | 0.849313459 |
| <i>Ninj1</i>      | -0.631371081      | 0.645562606 | 0.026121056 | 0.786597241 |
| <i>AK157302</i>   | -0.613784245      | 0.653480348 | 0.027939    | 0.790632397 |
| <i>Lmo2</i>       | -0.596327165      | 0.661435707 | 0.036328525 | 0.822769655 |

**Supplementary Information Table 3. Differentially expressed (upregulated) genes in cardiomyocytes isolated from diabetic high fat diet-fed mice exposed to linagliptin (9nmol/L) for 24h in comparison to vehicle (n=3/condition).**

| Gene name          | log2(Fold change) | Fold change | p_value     | q_value     |
|--------------------|-------------------|-------------|-------------|-------------|
| <i>Scamp4</i>      | 1.851557641       | 3.608896181 | 0.005031597 | 0.998619142 |
| <i>Myh7</i>        | 1.361132615       | 2.568867742 | 0.019358164 | 0.998619142 |
| <i>Tmem70</i>      | 1.336209206       | 2.524870171 | 0.00502486  | 0.998619142 |
| <i>ALT732309.1</i> | 1.282451651       | 2.432519973 | 0.004318908 | 0.998619142 |
| <i>Ramp2</i>       | 1.050820552       | 2.071707824 | 0.007812122 | 0.998619142 |
| <i>Paqr7</i>       | 0.984806517       | 1.97904788  | 0.025137932 | 0.998619142 |
| <i>Gcdh</i>        | 0.83411352        | 1.782761264 | 0.017684976 | 0.998619142 |
| <i>Umad1</i>       | 0.821971132       | 1.767819688 | 0.010382348 | 0.998619142 |
| <i>Pigq</i>        | 0.812556816       | 1.756321326 | 0.049406831 | 0.998619142 |
| <i>Cbfa2t</i>      | 0.70972981        | 1.63549779  | 0.036951267 | 0.998619142 |
| <i>Plpp7</i>       | 0.680145043       | 1.602300836 | 0.015728579 | 0.998619142 |
| <i>Cuedc1</i>      | 0.656655018       | 1.576423343 | 0.037036577 | 0.998619142 |
| <i>Phrf1</i>       | 0.644183357       | 1.562854376 | 0.006744636 | 0.998619142 |
| <i>Lbhd1</i>       | 0.632895933       | 1.550674553 | 0.02958863  | 0.998619142 |
| <i>Thra</i>        | 0.621814976       | 1.538809857 | 0.016168957 | 0.998619142 |
| <i>Amdhd2</i>      | 0.620319757       | 1.53721585  | 0.018407393 | 0.998619142 |
| <i>Selenbp1</i>    | 0.603192739       | 1.519074619 | 0.039961717 | 0.998619142 |
| <i>Lysmd1</i>      | 0.589447986       | 1.50467091  | 0.035437357 | 0.998619142 |

**Supplementary Information Table 4. Differentially expressed (downregulated) genes in cardiomyocytes isolated from diabetic high fat diet-fed mice exposed to linagliptin (9nmol/L) for 24h in comparison to vehicle (n=3/condition).**

| Gene name      | log2(Fold change) | Fold change | p_value     | q_value     |
|----------------|-------------------|-------------|-------------|-------------|
| <i>Adat3</i>   | -1.615436324      | 0.326366227 | 0.000189328 | 0.978868628 |
| <i>Slc10a4</i> | -1.204130317      | 0.434030907 | 0.030403769 | 0.998619142 |
| <i>Itgb6</i>   | -0.651098367      | 0.636795318 | 0.013982245 | 0.998619142 |
| <i>Ins16</i>   | -0.636795318      | 0.64444906  | 0.005209072 | 0.998619142 |
| <i>Esy2</i>    | -0.587954972      | 0.665285284 | 0.007292278 | 0.998619142 |
